# Supplementary material for: Post–COVID-19 Condition in Children 6 and 12 Months After Infection
Source: PubMed Central journal article supplement (PMC10755606; doi:10.1001/jamanetworkopen.2023.49613), 2023-12-28
Supplement: jamanetwopen-e2349613-s002.pdf [file jamanetwopen-e2349613-s002.pdf]

\*First name, last name, and suffix (if applicable) are required and will appear in PubMed.

| <b>*Group Name(s): Pediatric Emergency Research Canada (PERC) COVID Study Group</b> |                   |                              |                  |                                        |                                          |                                                         |                                                                                            |
|-------------------------------------------------------------------------------------|-------------------|------------------------------|------------------|----------------------------------------|------------------------------------------|---------------------------------------------------------|--------------------------------------------------------------------------------------------|
| <b>*First Name and Middle Initial(s)</b>                                            | <b>*Last Name</b> | <b>*Suffix (eg, Jr, III)</b> | Academic Degrees | Institution                            | Location (city, state/province, country) | Role or Contribution, eg, chair, principal investigator | Group (if more than 1 Group listed in the byline) and/or Subgroup (eg, Steering Committee) |
| Bruce                                                                               | Wright            |                              | MD               | University of Alberta                  | Edmonton, Alberta, Canada                | Site Investigator                                       |                                                                                            |
| Tyrus                                                                               | Crawford          |                              | B.Soc.Sci        | Children's Hospital of Eastern Ontario | Ottawa, Ontario, Canada                  | Database Manager                                        |                                                                                            |
| Waleed                                                                              | Alqurashi         |                              | MD               | Children's Hospital of Eastern Ontario | Ottawa, Ontario, Canada                  | Scientific Collaborator                                 |                                                                                            |
| Samina                                                                              | Ali               |                              | MDCM             | University of Alberta                  | Edmonton, Alberta, Canada                | Vice-Chair of Research network                          |                                                                                            |
