# Supplementary material for: Post–COVID-19 Condition in Children 6 and 12 Months After Infection
Source: PubMed Central journal article supplement (PMC10755606; doi:10.1001/jamanetworkopen.2023.49613), 2023-12-28
Supplement: jamanetwopen-e2349613-s003.pdf [file jamanetwopen-e2349613-s003.pdf]

## Data Sharing Statement

Dun-Dery. Post-COVID-19 Condition in Children 6 and 12 Months After Infection. *JAMA Netw Open*. Published December 28, 2023. doi:10.1001/jamanetworkopen.2023.49613

### Data

**Data available:** Yes

**Data types:** Deidentified participant data

**How to access data:** Data will be shared, upon reasonable request, for academic purposes, with appropriate individuals who have obtained appropriate ethics permissions and data sharing agreements.

**When available:** With publication

### Supporting Documents

**Document types:** Statistical/analytic code, Informed consent form

**How to access documents:** Data will be shared, upon reasonable request, for academic purposes, with appropriate individuals who have obtained appropriate ethics permissions and data sharing agreements.

**When available:** With publication

### Additional Information

**Who can access the data:** Data will be shared, upon reasonable request, for academic purposes, with appropriate individuals who have obtained appropriate ethics permissions and data sharing agreements.

**Types of analyses:** Data will be shared, upon reasonable request, for academic purposes, with appropriate individuals who have obtained appropriate ethics permissions and data sharing agreements.

**Mechanisms of data availability:** Data will be shared, upon reasonable request, for academic purposes, with appropriate individuals who have obtained appropriate ethics permissions and data sharing agreements.
